# Supplementary figures and images for: Fitting potential energy and induced dipole surfaces of the van der Waals complex CH4–N2 using non-product quadrature grids
Source: Royal Society of Chemistry journal article supplement (doi:10.1039/d1cp02161c), 2021-01-01

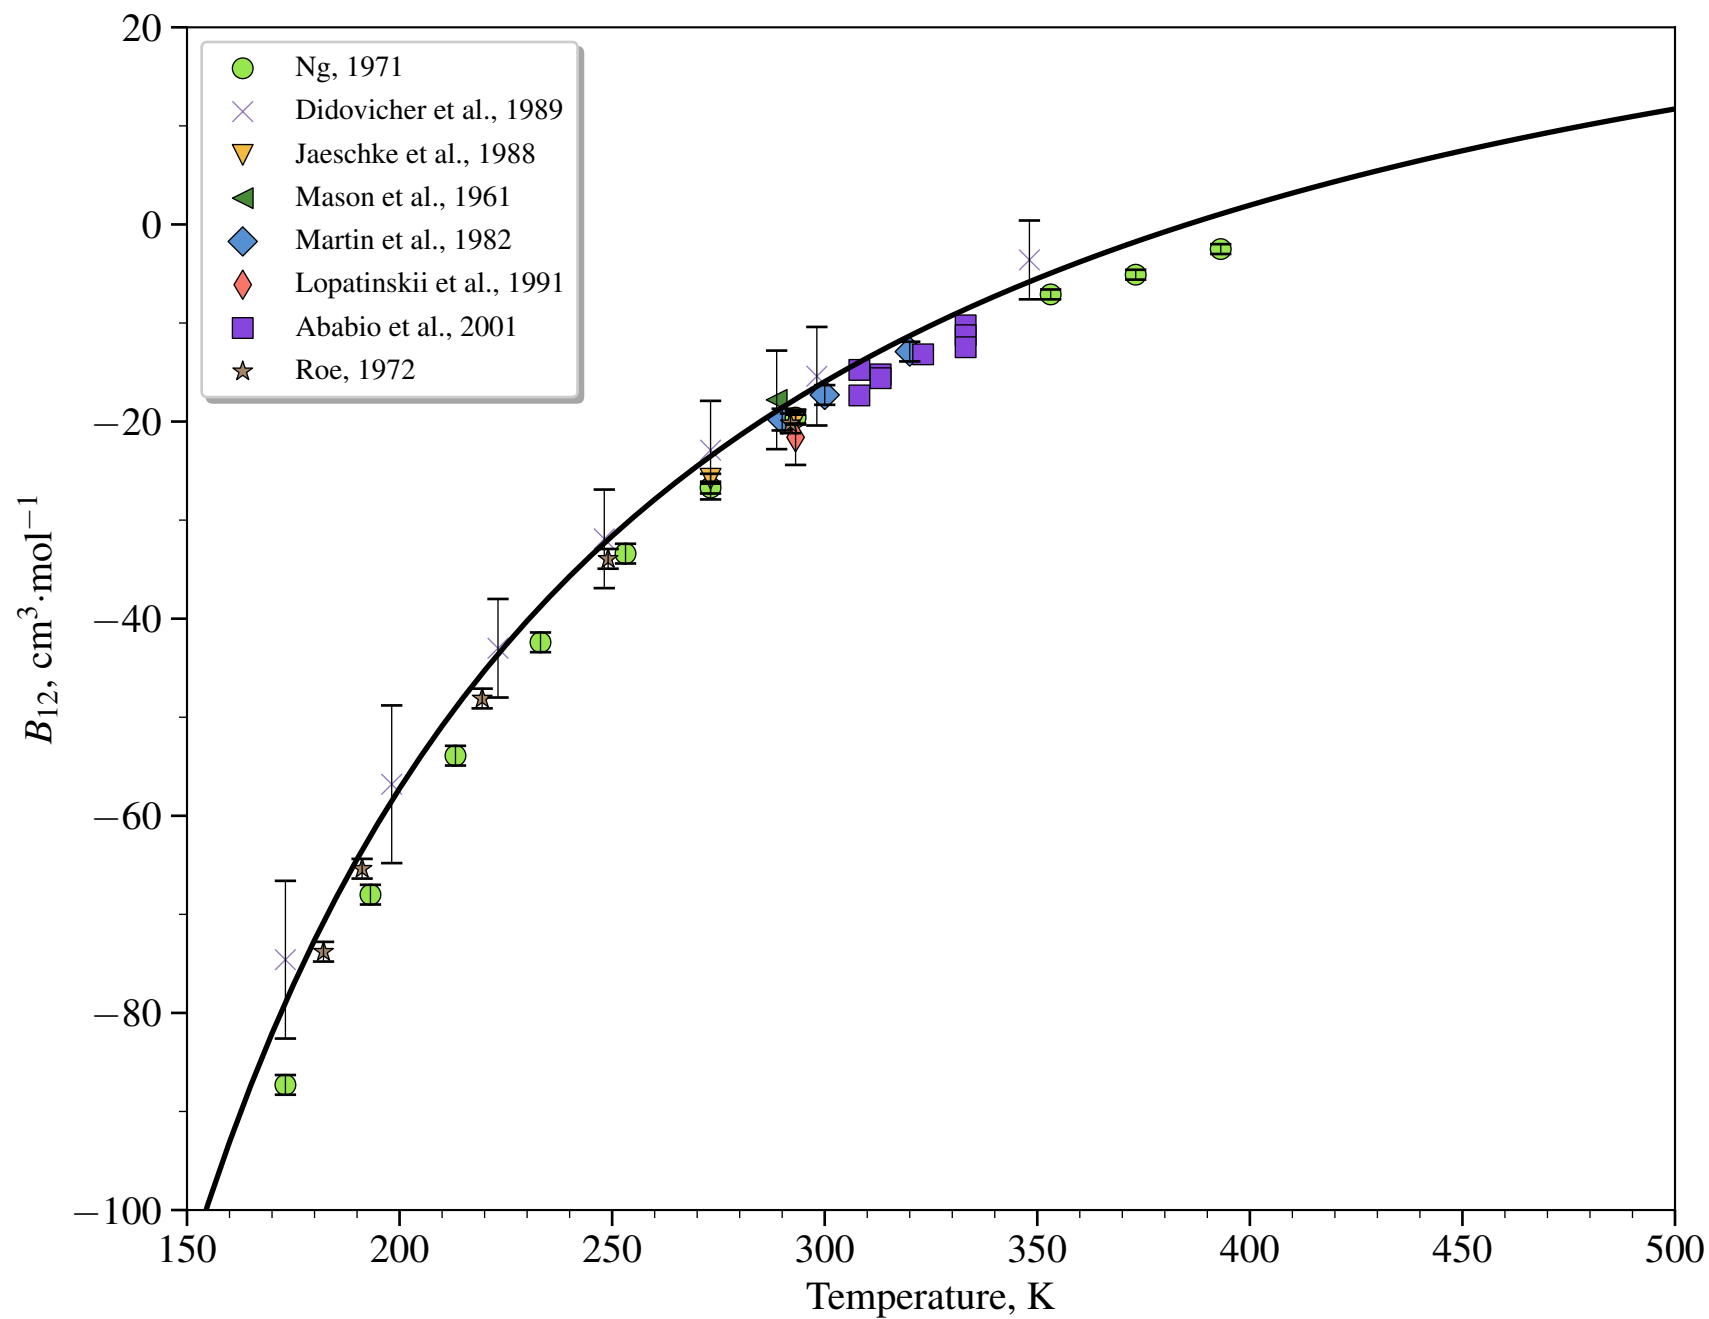

Supplement: d1cp02161c1.zip [file d1cp02161c1.zip]
